# Supplementary material for: Attenuation of PKCδ enhances metabolic activity and promotes expansion of blood progenitors
Source: PubMed Central journal article supplement (PMC6293338; doi:10.15252/embj.2018100409), 2018-11-16
Supplement: EMBJ-37-e100409-s001.pdf [file EMBJ-37-e100409-s001.pdf]

# Appendix

## Table of Contents

|                         |          |
|-------------------------|----------|
| Appendix Figure legends | page 2-4 |
| Appendix Figure S1      | page 5   |
| Appendix Figure S2      | page 6   |
| Appendix Figure S3      | page 7   |
| Appendix Table 1        | page 8   |
| Appendix Table 2        | page 9   |

## Appendix Figure S1.

### Increased frequency of bone marrow HSPCs in PKC $\delta$ -deficient mice.

**A.** Total BM cell numbers from two femurs and 2 tibias of *WT* or PKC $\delta$  KO mice. Data compiled from n=14 mice per each genotype.

**B.** Frequency of Lin-Sca1+ckit+ (LSK) cells, as a percent of live cells, in the fetal liver of embryonic day 14.5 (e14.5) embryos of mice of the indicated genotype (n=5 embryos analyzed per genotype). Data represent mean  $\pm$  SEM., and indicate no statistically significant differences by one-way ANOVA analysis with subsequent Holm-Sidak's multiple comparison tests.

**C.** Quantification of colony formation from total BM cells harvested from *WT* (n=6) or PKC $\delta$  KO (n=6) mice. Colony forming unit cell (CFUc) frequencies were determined at day 12 after seeding in methylcellulose medium and presented as number per 20,000 BM cells. Each sample was plated in duplicate in each experiment. Data are pooled from 3 independent experiments and presented as mean  $\pm$  SEM. \*\* $p$ <0.01 by two-tailed Student's unpaired *t*-test analysis for comparison of control and PKC $\delta$  KO mice.

**D.** Schematic of the spleen colony forming unit assay (CFU-s). Bar graph represents the number of colonies formed per spleen at day 8 (CFU-S<sub>8</sub>) and day13 (CFU-S<sub>13</sub>) after transplantation of pooled total BM (n=2 donor mice for each genotype) into irradiated recipients (n=5 recipients for each genotype). Data presented as mean  $\pm$  SEM. \*\* $p$ <0.01 by two-tailed Student's unpaired *t*-test analysis for comparison of control and PKC $\delta$  cKO mice. As CFU-S<sub>8</sub> reads out primarily oligolineage progenitor cell activity, whereas CFU-S<sub>13</sub> reflects the presence of less differentiated multipotent progenitors and HSCs (Zhang et al., 2009), these data are consistent with a selective expansion of the most primitive HSPC subsets in PKC $\delta$  KO BM.

**E,F** Schematic of competitive transplantation assays using FACS-purified LT-HSCs (**E**). Percent of total donor-derived, hematopoietic cells (CD45.2<sup>+</sup>), B-cells (B220<sup>+</sup>), myeloid cells (CD11b<sup>+</sup>Gr1<sup>+</sup>), and T cells (CD3<sup>+</sup>) in the peripheral blood (PB) of recipient mice, as determined by FACS at the

indicated time points (**F**). (n=5 recipients per genotype). No statistically significant differences in reconstitution were detected.

Data Information: All the data presented as presented as mean  $\pm$  SEM. \*\* $p < 0.01$  by two-tailed Student's unpaired *t*-test analysis (**A-D**) or two-way ANOVA analysis with Sidak's multiple comparison tests (**F**).

### **Appendix Figure S2.**

#### **Augmented HSPC pool size and contribution to mature peripheral blood cells following loss of PKC $\delta$ in the hematopoietic system.**

**A.** Experimental outline of competitive BM reconstitution assay.

**B.** Representative FACS plots show the percentage of total donor derived (CD45.2<sup>+</sup>) cells in PB of recipient mice at 16-weeks post-plpC treatment. Bar graph shows the percentages of total donor-derived cells in the PB of recipient mice at indicated times pre-and post-plpC treatment. (n=7-8 mice per genotype).

Data information: Statistical significance was determined by repeated measures two-way ANOVA analysis with Sidak's multiple comparison tests for comparison of control and *PKC $\delta$  cKO* mice at each time point. \* $p < 0.05$  and \*\* $p < 0.01$ .

### **Appendix Figure S3.**

#### **PKC $\delta$ sets a threshold for metabolic activation of HSPCs during myeloablative regeneration.**

**A.** Experimental design.

**B.** Mitochondrial OCR rate in bone marrow HSPCs. MitoStress test revealed increased basal oxygen consumption rates (OCR) (measured before inhibitors treatment, left); the Maximal OCR capacity after FCCP treatment (middle), and the production of ATP (right) in LSKs from 5-FU treated *PKC $\delta$  <sup>$\Delta/\Delta$</sup>*  (cKO) mice as compared to LSKs from treated WT mice.

Data information: All data are presented as mean  $\pm$  SEM (n=6 mice per genotype), \* $p < 0.05$  and

\*\* $p < 0.01$ , by two-tailed Student's unpaired  $t$ -test analysis for comparison of control and PKC $\delta$  cKO mice.

# Appendix Figure S1

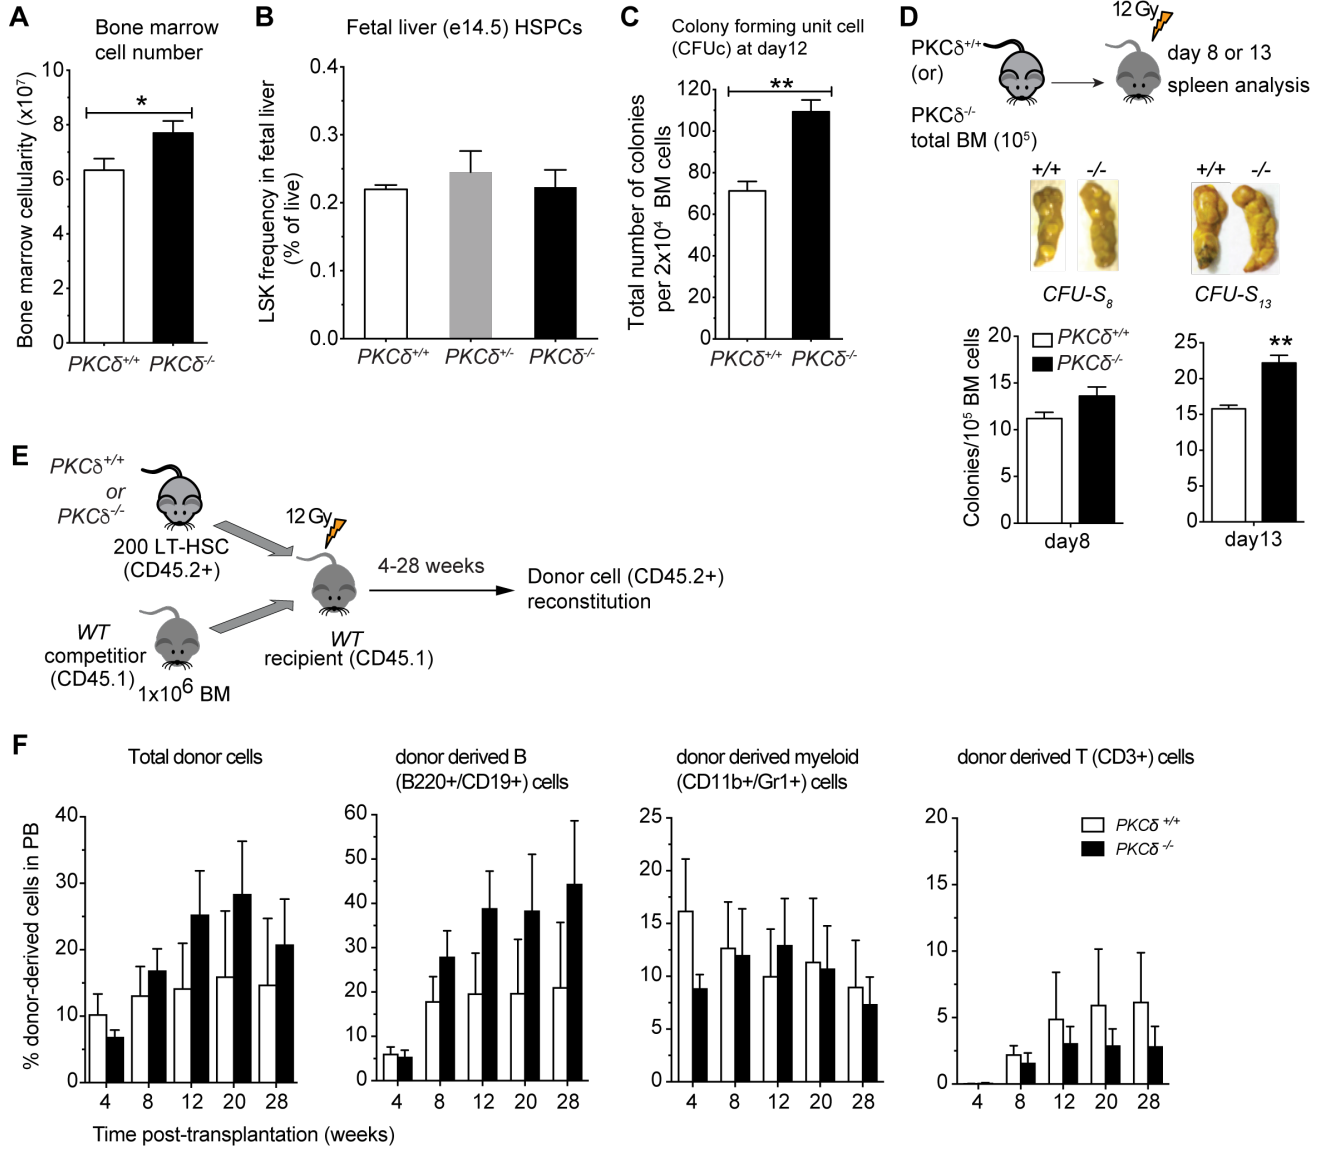

## Appendix Figure S2

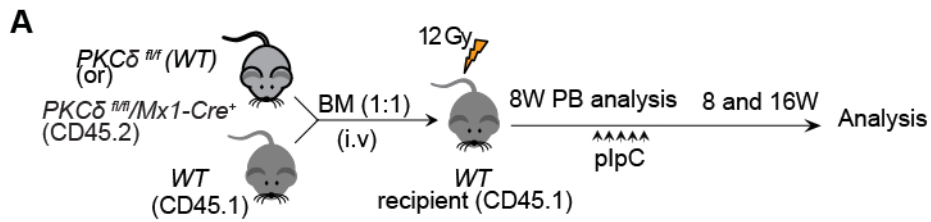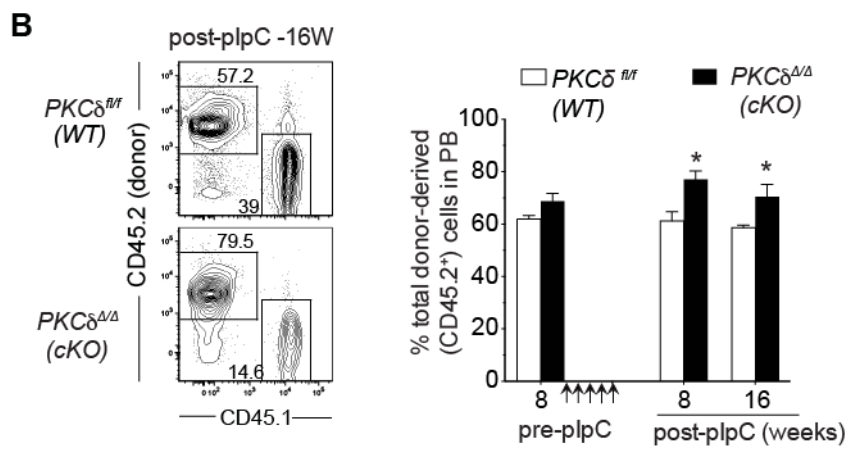

## Appendix Figure S3

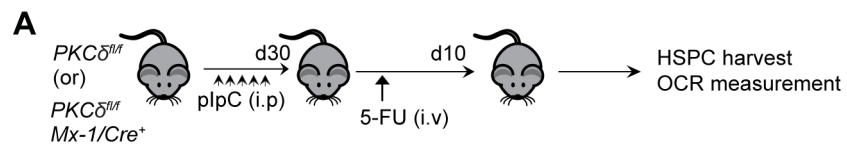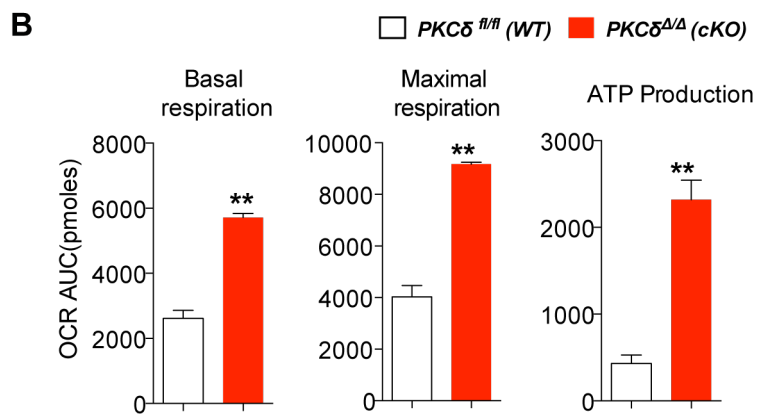

**Appendix Table 1** (related to Materials and Methods and Figure 7). List of genes and primers used for RT-PCR analysis. All Taqman primers (FAM) were purchased from Applied Biosystems.

| <b>Gene</b>                     | <b>Product ID</b> |
|---------------------------------|-------------------|
| <i>Pdk2</i>                     | Mm00446681_m1     |
| <i>Pdk4</i>                     | Mm01166879_m1     |
| <i>Ldha1</i>                    | Mm01612132_g1     |
| <i>Acads</i>                    | Mm00431617_m1     |
| <i>Hes1</i>                     | Mm01342805_m1     |
| <i>ATP5a1</i>                   | Mm00431960_m1     |
| <i>Cox5a1</i>                   | Mm01176957_m1     |
| <i>Cyc1</i>                     | Mm00470540_m1     |
| <i>Cdkn2c</i>                   | Mm00483243_m1     |
| <i>Cdkn1b</i>                   | Mm00438168_m1     |
| <i>Mcl1</i>                     | Mm00725832_s1     |
| <i>Bcl2l1</i>                   | Mm00437783_m1     |
| <i>Egr1</i>                     | Mm00656724_m1     |
| <i>Gfi1b</i>                    | Mm00492318_m1     |
| <i>Bad</i>                      | Mm00432042_m1     |
| <i>Cdkn2a</i>                   | Mm00494449_m1     |
| <i>Cebp<math>\alpha</math></i>  | Mm00514283_s1     |
| <i>Nfe2L2 (Nrf2)</i>            | Mm00477784_m1     |
| <i><math>\beta</math>-Actin</i> | Mm00607939_s1     |
| <i>TBP</i>                      | Mm00446971_m1     |
| <i>Gata1</i>                    | Mm01352636_m1     |
| <i>Gata2</i>                    | Mm00492301_m1     |
| <i>ID2</i>                      | Mm00711781_m1     |
| <i>Pkm</i>                      | Mm00834102_gH     |
| <i>Spi1 (PU.1)</i>              | Mm00488142_m1     |



**Appendix Table 2.** List of primary and secondary antibodies used for intracellular flow cytometry.

| <b>Primary antibody</b>                                                                          | <b>Supplier</b>           | <b>Catalogue#</b> | <b>Dilution</b> |
|--------------------------------------------------------------------------------------------------|---------------------------|-------------------|-----------------|
| Phospho-Akt (Ser473) (D9E) XP <sup>®</sup><br>Rabbit mAb                                         | Cell Signaling Technology | 4060              | 1:200           |
| PhosphoDetect™ Anti-PDH-E1α<br>(pSer293) Rabbit pAb                                              | Millipore                 | AP1062            | 1:100           |
| Phospho-FoxO3a (Ser253)<br>Antibody                                                              | Cell Signaling Technology | 9466              | 1:100           |
| Phospho-S6 Ribosomal Protein<br>(Ser235/236) (D57.2.2E) XP <sup>®</sup><br>Rabbit mAb            | Cell Signaling Technology | 4858P             | 1:100           |
| Phospho-Rb (Ser807/811)<br>(D20B12) XP <sup>®</sup> Rabbit mAb                                   | Cell Signaling Technology | 8516S             | 1:400           |
| c-Myc(D84C12) Rabbit mAb<br>(Alexa Fluor 647 conjugate)                                          | Cell Signaling Technology | 13871             | 1:50            |
| Cyclin D1(92G2) Rabbit mAb                                                                       | Cell Signaling Technology | 2978              | 1:50            |
| PPAR <sub>γ</sub> (C26H12) Rabbit mAb                                                            | Cell Signaling Technology | 2435              | 1:100           |
| Anti-PPAR <sub>δ</sub> (C26H12) Rabbit<br>polyclonal Ab                                          | Abcam                     | ab23673           | 1:100           |
| Phospho-NF-κB p65 (Ser536)<br>(93H1) Rabbit mAb (Alexa Fluor <sup>®</sup><br>647 Conjugate) #488 | Cell Signaling Technology | 4887              | 1:50            |
| Phospho-mTOR (Ser2448) (D9C2)<br>XP <sup>®</sup> Rabbit mAb                                      | Cell Signaling Technology | 5536              | 1:50            |
| Phospho-p38 MAPK<br>(Thr180/Tyr182) (D3F9) XP <sup>®</sup><br>Rabbit mAb                         | Cell Signaling Technology | 4511              | 1:400           |
| Phospho-p44/42 MAPK (Erk1/2)<br>(Thr202/Tyr204) (197G2) Rabbit<br>mAb                            | Cell Signaling Technology | 4377              | 1:200           |
| Anti-rabbit IgG (H+L), F(ab') <sub>2</sub><br>fragment (Alexa Fluor 647<br>conjugate)            | Cell Signaling Technology | 4414              | 1:500           |
| Anti-rabbit IgG (H+L), F(ab') <sub>2</sub><br>fragment (Alexa Fluor 488<br>conjugate)            | Cell Signaling Technology | 4412              | 1:500           |
