# Supplementary material for: Attenuation of PKCδ enhances metabolic activity and promotes expansion of blood progenitors
Source: PubMed Central journal article supplement (PMC6293338; doi:10.15252/embj.2018100409), 2018-11-16
Supplement: EMBJ-37-e100409-s002.pdf [file EMBJ-37-e100409-s002.pdf]

## Expanded View Figures

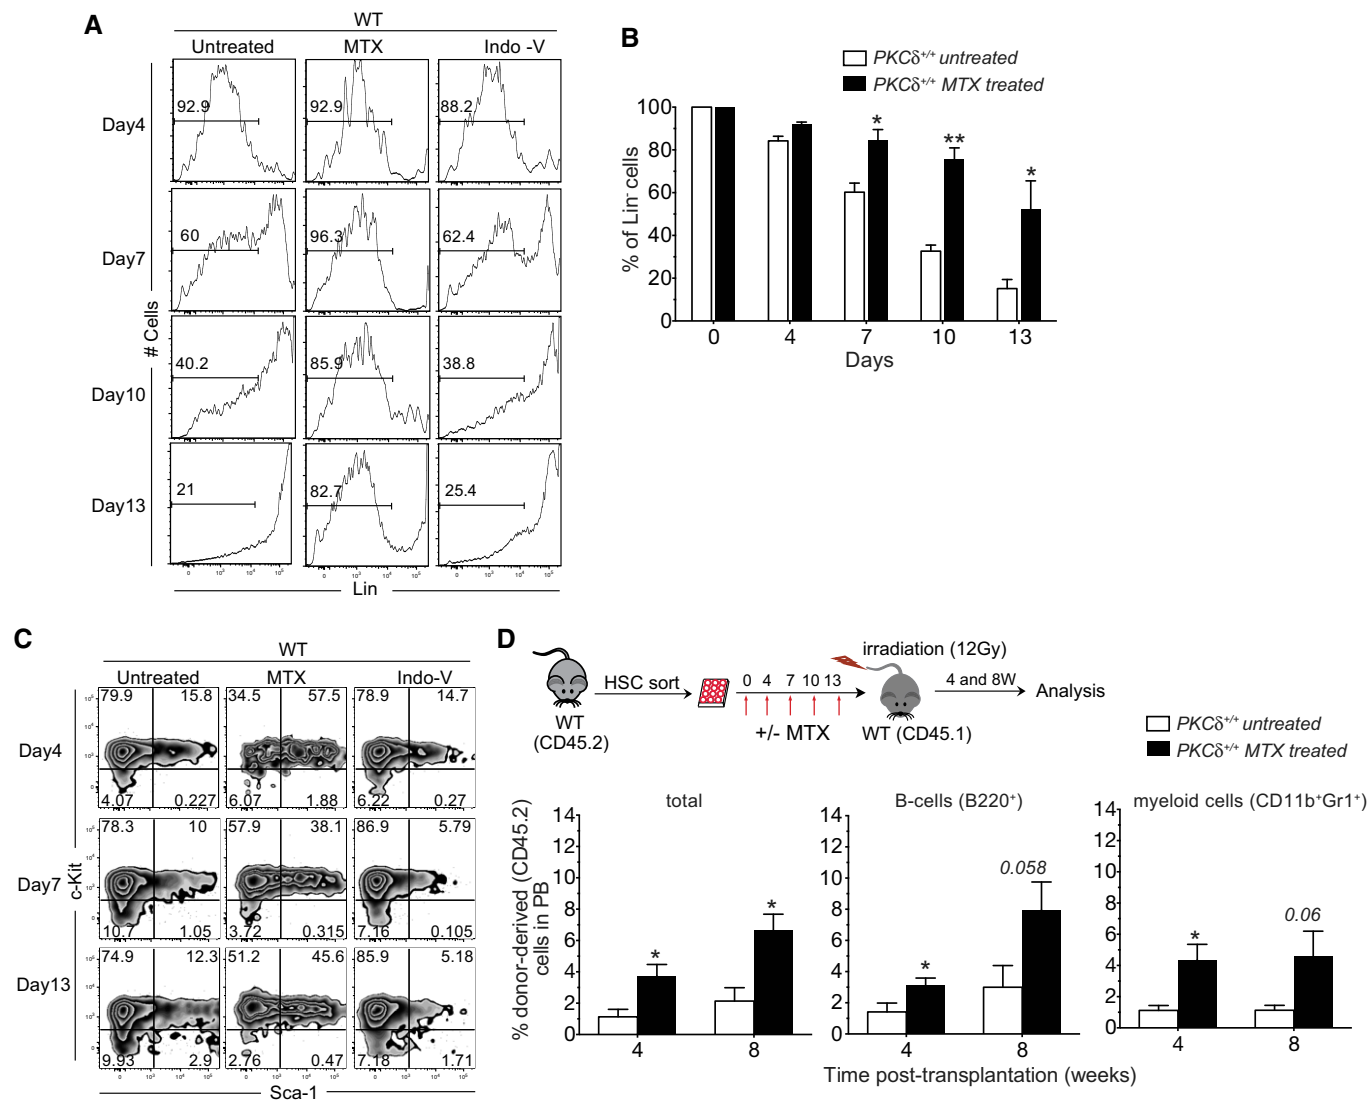

**Figure EV1. Pharmacological modulation of PKC $\delta$  activity preserves HSPC activity *in vitro*.**

A, B One hundred HSCs were sorted from WT mice and cultured in 96-well (U-bottom) plates in triplicate in the presence of mSCF (20 ng/ml) and mTPO (20 ng/ml) and with or without Malloctoxin (MTX, 5  $\mu$ M) or Indolactam V (Indo-V, 10  $\mu$ M) for indicated time. (A) FACS histograms and (B) bar graph show the percentage of Lin<sup>+</sup> cells (pre-gated on live cells).

C At the indicated time of culture, cells were analyzed for LSK phenotype. Representative FACS plots showing the percentage of cells retaining LSK phenotype. Data are representative of two independent experiments ( $n = 5$  mice total per treatment group).

D Schematic of competitive reconstitution analysis of MTX-treated WT HSPCs. After 13 days in culture, cells were transplanted into recipient mice along with  $1 \times 10^6$  competitive total BM cells (CD45.1<sup>+</sup>). Percentage of total donor-derived cells (CD45.2<sup>+</sup>), B cells (B220<sup>+</sup>), and myeloid cells (CD11b<sup>+</sup> Gr1<sup>+</sup>) in the peripheral blood was analyzed at indicated time ( $n = 6$  mice per condition).

Data information: All data shown as mean  $\pm$  SEM. \* $P < 0.05$  and \*\* $P < 0.01$  by repeated measures one-way ANOVA analysis with Bonferroni posttest.

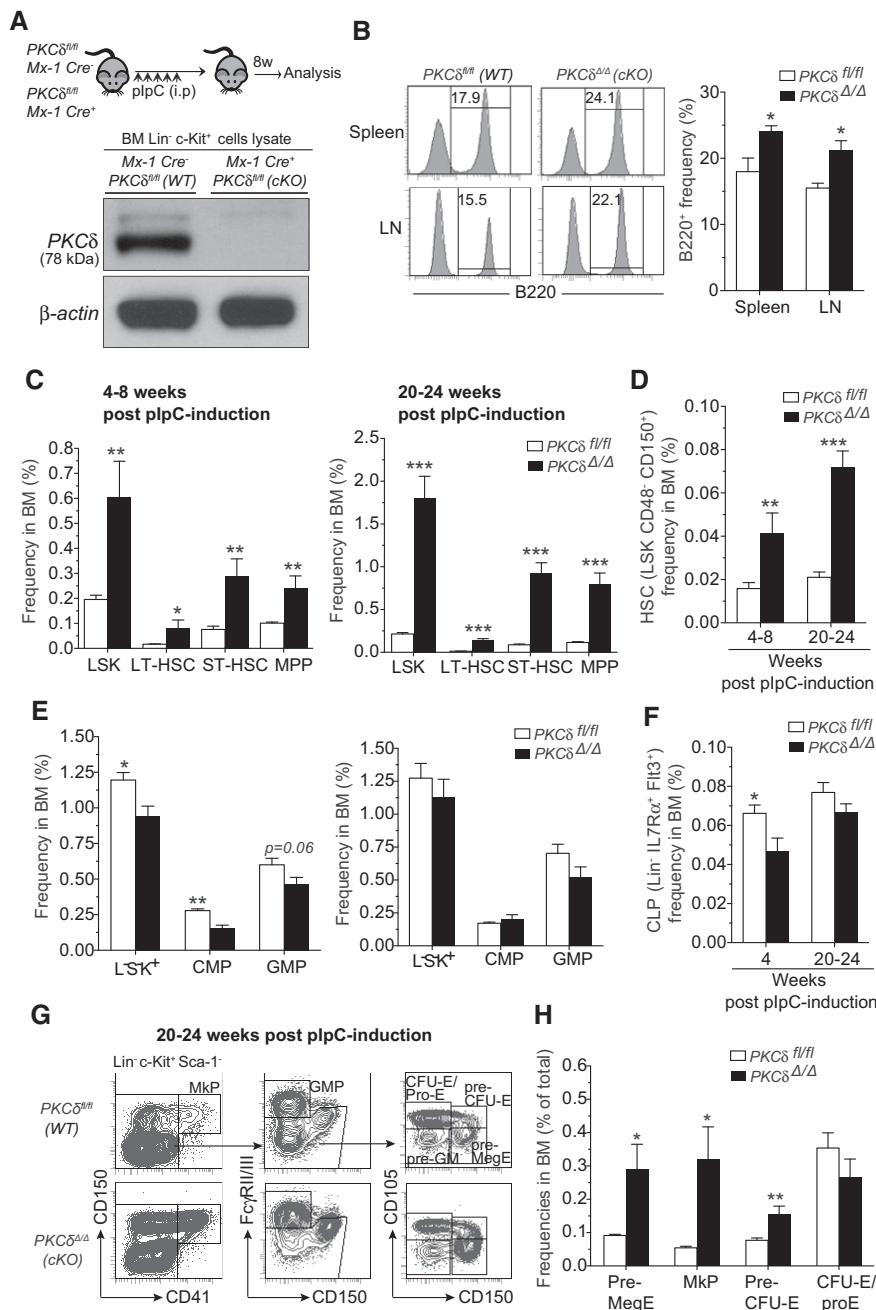

**Figure EV2. Characterization of hematopoietic stem and progenitor cell subsets in the BM of WT and PKC $\delta$  cKO mice.**

- A Experimental design. Representative Western blot analysis for detecting PKC $\delta$  protein in Lin<sup>-</sup>Kit<sup>+</sup> BM cells from indicated mice at 8-week post-plpC treatment shows absence of PKC $\delta$  protein in cKO cells.
- B FACS histograms show the frequency of B220<sup>+</sup> cells in spleen and lymph nodes of cKO mice at 24-week post-plpC treatment ( $n = 6-8$  mice per genotype).
- C Increased frequency of HSPCs in the BM of control and cKO mice at 4-8 or 20-24 weeks after plpC treatment ( $n = 8-9$  mice per genotype and time point).
- D, E Frequency of HSCs (HSC-SLAM) (D), and myeloid progenitor subsets (E) in the BM of control and cKO mice at 4-8 and 20-24 weeks after plpC treatment ( $n = 8-9$  mice per genotype and time point).
- F Frequency of common lymphoid progenitors (CLPs) in the BM of control and cKO mice at 4-8 and 20-24 weeks after plpC treatment ( $n = 6$  mice per genotype and time point).
- G Representative FACS plots show the gating strategy of MkP, Pre-MegE, MkP, Pre-CFU-E, and CFU-E/Pro-E subpopulations in the BM of WT and cKO mice at 24 weeks after plpC treatment.
- H Frequencies of indicated subsets in the total BM ( $n = 6$  mice per genotype).

Data information: All data are presented as mean  $\pm$  SEM, \* $P < 0.05$ , \*\*\* $P < 0.01$ , and \*\*\* $P < 0.001$ , by repeated measures two-way ANOVA analysis with Sidak's multiple comparison tests (B, D, and F) or by two-tailed Student's unpaired  $t$ -test analysis (C, E, and H).

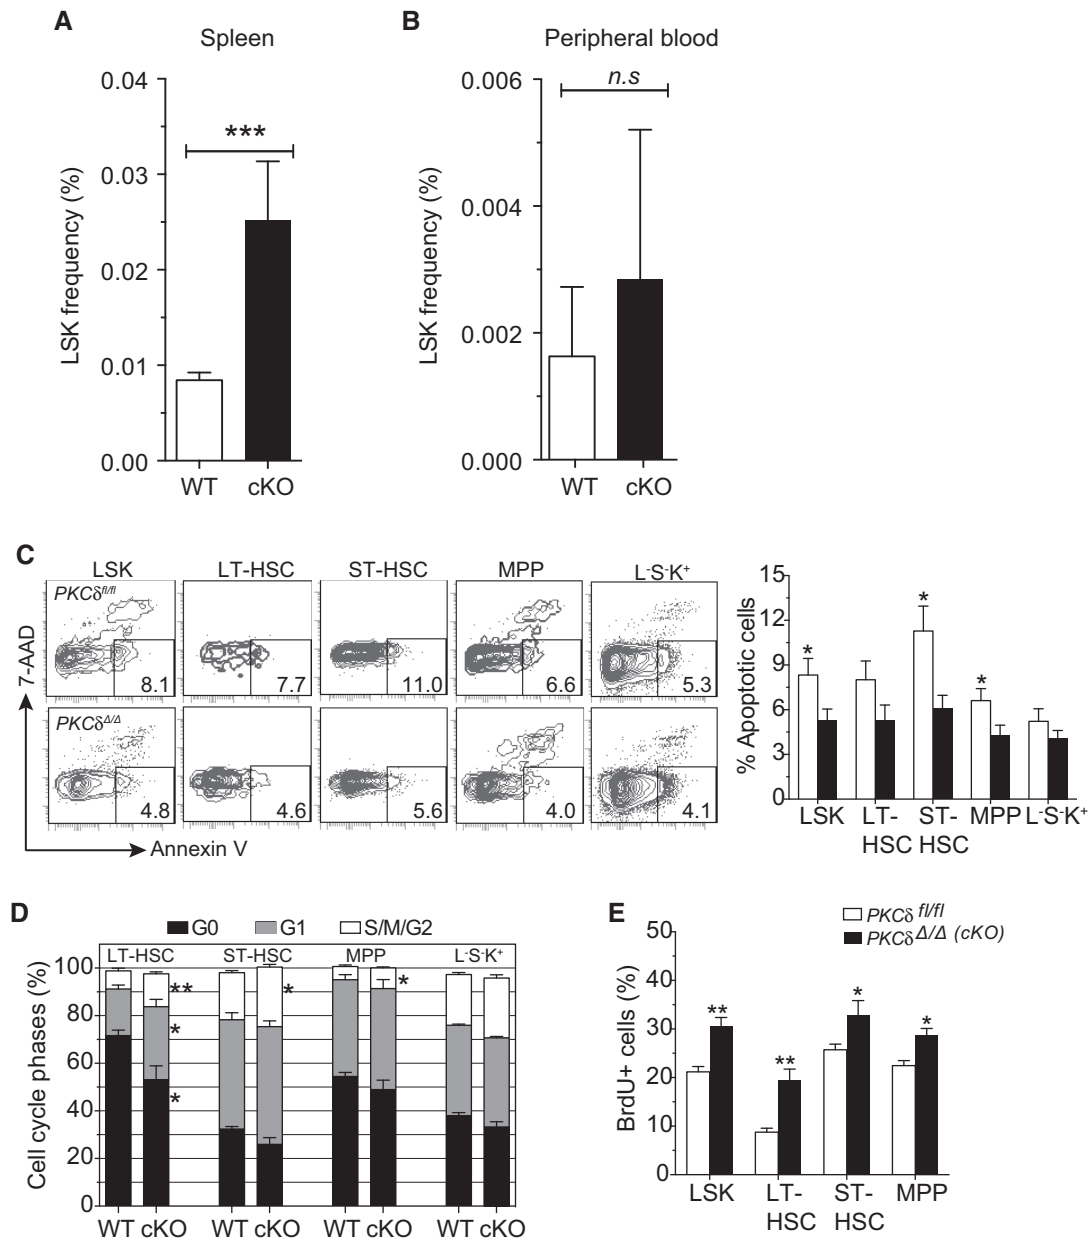

**Figure EV3. Expanded HSPC pool size in PKC $\delta$  cKO mice.**

- A Frequency of LSK cells in the spleen of control and cKO mice at 20–24 weeks after plpC treatment ( $n = 4-5$  mice per genotype).
- B Frequency of LSK cells in the peripheral blood of control and cKO mice at 20–24 weeks after plpC treatment ( $n = 4-5$  mice per genotype).
- C Representative FACS plots and bar graph show the mean percentage of apoptotic cells in the indicated HSPC subsets of PKC $\delta^{fl/fl}$  (control) and PKC $\delta$  cKO BM at 8 weeks after plpC treatment ( $n = 7$  mice per genotype).
- D Cell cycle distribution of indicated HSPC subsets from PKC $\delta^{fl/fl}$  (WT) and PKC $\delta$  cKO mice at 8 weeks after plpC treatment ( $n = 7$  mice per genotype) as assessed by Ki67-Hoechst staining.
- E Short-term BrdU incorporation assay. Bar graph shows the percentage of BrdU<sup>+</sup> cells in each BM HSPC subsets of PKC $\delta^{fl/fl}$  (control) and PKC $\delta$  cKO mice at 8 weeks after plpC treatment ( $n = 7$  mice per genotype).

Data information: All data are presented as mean  $\pm$  SEM, \* $P < 0.05$ , \*\*\* $P < 0.01$ , and \*\*\*\* $P < 0.001$ , by two-tailed Student's unpaired t-test analysis.

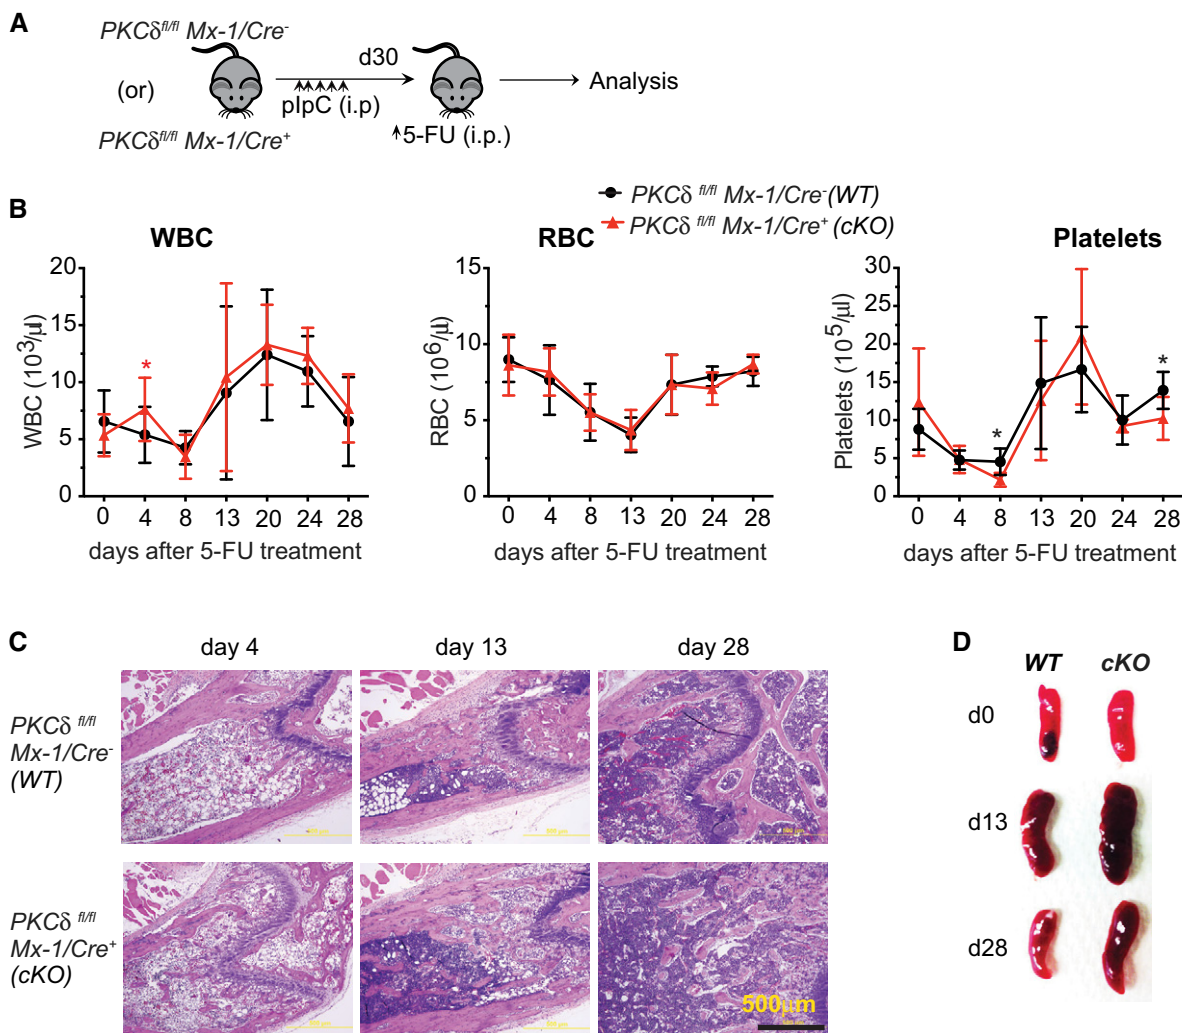

**Figure EV4. Hematopoietic recovery in  $PKC\delta^{fl/fl}$  and  $PKC\delta$  cKO mice after 5-FU treatment.**

A, B (A) Experimental design, (B) kinetics of white blood cells (WBC), red blood cells (RBC), and platelet cell recovery in peripheral blood of WT and cKO mice after single dose of 5-FU treatment ( $n = 8-12$  mice per genotype).

C Representative hematoxylin–eosin (H&E)-stained femur sections from indicated mice at day 4 of 13 and 28 after a single injection of 5-FU treatment (bottom) ( $n = 4-5$  mice per time point for each genotype).

D Enlarged spleen in  $PKC\delta^{fl/fl}$  (cKO) mice during recovery phase (d13) after 5-FU treatment. Spleen size of WT and cKO mice at indicated time points after 5-FU treatment.

Data information: All data are presented as mean  $\pm$  SEM, by repeated measures two-way ANOVA analysis with Sidak's multiple comparison tests (B) for comparison of control and  $PKC\delta$  cKO mice at each time point. \* $P < 0.05$ .

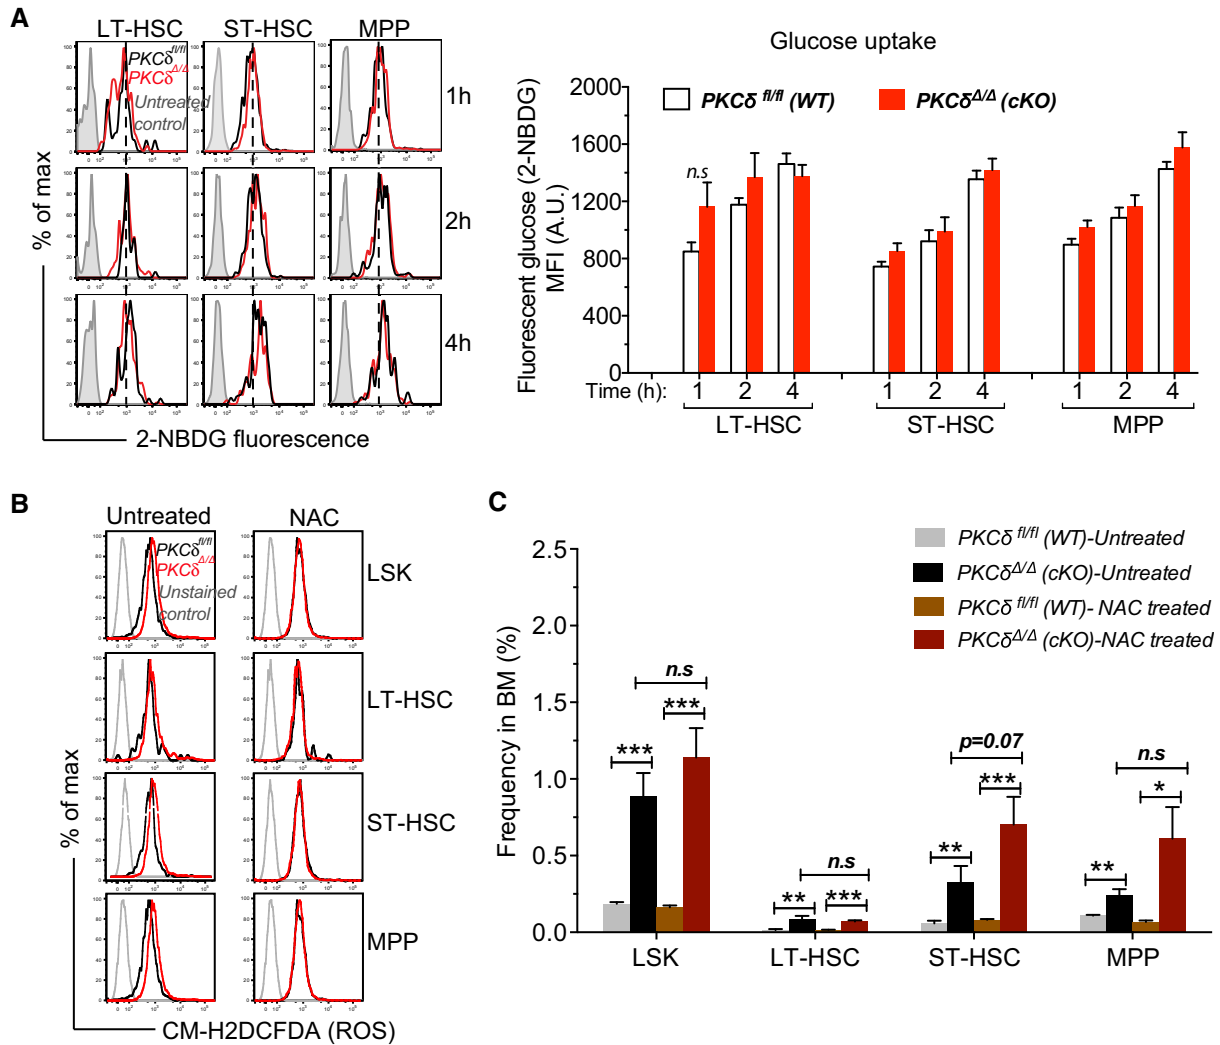

**Figure EV5. Altered metabolic activity in PKC $\delta$ -deficient cKO HSPCs is not due to impaired glucose uptake, and inhibiting ROS levels via NAC treatment does not rescue increased HSPC pool size in PKC $\delta$ -deficient BM.**

**A** FACS-sorted HSPC subsets were incubated with 2-NBDG for the indicated time. Representative histograms of 2-NBDG fluorescence at time indicated. Mean fluorescence intensity (MFI) of 2-NBDG fluorescence at indicated time. Cells treated without 2-NBDG used as controls. ( $n = 5$  mice per genotype, mean  $\pm$  SEM).

**B** NAC treatment rescued the increased ROS levels in PKC $\delta$ -deficient HSPCs. Representative histograms of CM-H2DCFDA fluorescence.

**C** NAC treatment did not rescue increased HSPC pool size in PKC $\delta$ -deficient BM. Bar graph represents HSPC frequency 8 weeks after NAC treatment. Untreated PKC $\delta^{fl/fl}$  and PKC $\delta^{\Delta/\Delta}$  (cKO) mice were used as controls ( $n = 6$  mice per genotype).

Data information: All data are presented as mean  $\pm$  SEM. Statistical significance was determined by repeated measures two-way ANOVA analysis with Sidak's multiple comparison tests (A and C). \* $P < 0.05$  and \*\* $P < 0.01$ .
