# Supplementary material for: Attenuation of PKCδ enhances metabolic activity and promotes expansion of blood progenitors
Source: PubMed Central journal article supplement (PMC6293338; doi:10.15252/embj.2018100409), 2018-11-16
Supplement: EMBJ-37-e100409-s003.pdf [file EMBJ-37-e100409-s003.pdf]

**Expanded view Table.1.** Differential blood cell counts on peripheral blood from *PKCδ<sup>+/+</sup>* and *PKCδ<sup>-/-</sup>* littermates revealed no differences in hematologic parameters.

| <b>Parameter</b>         | <b><i>PKCδ<sup>+/+</sup></i></b> | <b><i>PKCδ<sup>-/-</sup></i></b> | <b>p-value</b> |
|--------------------------|----------------------------------|----------------------------------|----------------|
| WBCs (K/ $\mu$ L)        | 5.63 $\pm$ 3.30                  | 7.16 $\pm$ 2.01                  | 0.28           |
| Neutrophils (K/ $\mu$ L) | 1.40 $\pm$ 0.91                  | 1.97 $\pm$ 0.74                  | 0.19           |
| Lymphocytes (K/ $\mu$ L) | 3.91 $\pm$ 2.21                  | 4.78 $\pm$ 1.60                  | 0.39           |
| Monocytes (K/ $\mu$ L)   | 0.26 $\pm$ 0.19                  | 0.30 $\pm$ 0.13                  | 0.68           |
| Eosinophils (K/ $\mu$ L) | 0.04 $\pm$ 0.08                  | 0.100 $\pm$ 0.11                 | 0.29           |
| Basophils (K/ $\mu$ L)   | 0.01 $\pm$ 0.02                  | 0.02 $\pm$ 0.03                  | 0.31           |
| RBC (M/ $\mu$ L)         | 9.69 $\pm$ 0.67                  | 9.73 $\pm$ 0.89                  | 0.92           |
| Hb (g/dL)                | 14.64 $\pm$ 0.77                 | 14.36 $\pm$ 0.99                 | 0.52           |
| HCT (%)                  | 47.41 $\pm$ 3.10                 | 46.91 $\pm$ 3.53                 | 0.77           |
| MCV (fL)                 | 48.98 $\pm$ 2.01                 | 48.36 $\pm$ 2.73                 | 0.61           |
| PLT (K/ $\mu$ L)         | 1,015.78 $\pm$ 142               | 880.67 $\pm$ 255.74              | 0.22           |

Values shown are means  $\pm$ SEM (n=10 mice per group). WBC indicates white blood cell; RBC, red blood cell; Hb, hemoglobin; HCT hematocrit; MCV, mean corpuscular volume; PLT, platelets.
