# Supplementary material for: Attenuation of PKCδ enhances metabolic activity and promotes expansion of blood progenitors
Source: PubMed Central journal article supplement (PMC6293338; doi:10.15252/embj.2018100409), 2018-11-16
Supplement: EMBJ-37-e100409-s004.pdf [file EMBJ-37-e100409-s004.pdf]

**Expanded view Table 2.** Differential blood cell counts on peripheral blood from  $PKC\delta^{fl/fl}$  (control) and  $PKC\delta^{\Delta/\Delta}$  (cKO) mice after 8-20 weeks of plpC induction revealed no differences in hematologic parameters.

| Parameter                | $PKC\delta^{fl/fl}$ (WT) | $PKC\delta^{\Delta/\Delta}$ (cKO) | p-value |
|--------------------------|--------------------------|-----------------------------------|---------|
| WBCs (K/ $\mu$ L)        | 6.56 $\pm$ 2.6           | 7.35 $\pm$ 1.7                    | 0.21    |
| Neutrophils (K/ $\mu$ L) | 1.3 $\pm$ 0.81           | 1.0 $\pm$ 0.91                    | 0.37    |
| Lymphocytes (K/ $\mu$ L) | 4.96 $\pm$ 2.2           | 5.0 $\pm$ 1.4                     | 0.21    |
| Monocytes (K/ $\mu$ L)   | 0.2 $\pm$ 0.12           | 0.36 $\pm$ 0.17                   | 0.32    |
| Eosinophils (K/ $\mu$ L) | 0.06 $\pm$ 0.1           | 0.1 $\pm$ 0.15                    | 0.46    |
| Basophils (K/ $\mu$ L)   | 0.01 $\pm$ 0.02          | 0.03 $\pm$ 0.05                   | 0.25    |
| RBC (M/ $\mu$ L)         | 9 $\pm$ 1.40             | 8.63 $\pm$ 2.0                    | 0.60    |
| Hb (g/dL)                | 11.2 $\pm$ 2.1           | 10.85 $\pm$ 1.73                  | 0.66    |
| HCT (%)                  | 43.5 $\pm$ 6.45          | 42.4 $\pm$ 7.2                    | 0.72    |
| MCV (fL)                 | 48.43 $\pm$ 2.24         | 49.7 $\pm$ 3.5                    | 0.26    |
| PLT (K/ $\mu$ L)         | 772 $\pm$ 293            | 1092 $\pm$ 720                    | 0.17    |

Values shown are means  $\pm$ SEM.  $PKC\delta^{fl/fl}$  (control, n=12) and cKO (n=14 mice). WBC indicates white blood cell; RBC, red blood cell; Hb, hemoglobin; HCT hematocrit; MCV, mean corpuscular volume; PLT, platelets.
